# Supplementary material
Source: ML conference proceedings conference paper supplement (https://openreview.net/forum?id=BmhWGsOyDu)
Supplement: supplementary_material [file attachment]

## A PROOF OF PROPOSITION 1

### A.1 EXISTENCE OF OPTIMAL POLICY

Let  $J : \mathcal{U} \rightarrow \mathbb{R}$  be the objective function defined as  $J(u) = V(x(0, \cdot))$ , then it suffices to show that  $J$  is a continuous function and the space of control policies  $\mathcal{U}$  is compact. Then, by the general fact in analysis that any continuous function defined on a compact space has a minimum (Rudin, 1976), the optimal control policy exists.

**Continuity of the objective functional.** Pick a sequence  $\{u_k\}_{k \in \mathbb{N}}$  in  $\mathcal{U}$  such that  $u_k$  converges pointwisely to  $u \in \mathcal{U}$ , then we need to show  $J(u_k) \rightarrow J(u)$ . Let  $x_k(t, \beta)$  be the trajectory (solution) of the ensemble system ensemble system in (1) driven by the control input  $u_k(t)$ , then  $x_k(t, \beta)$  satisfies the fixed point equation (Arnold, 1978),

$$x_k(t, \beta) = x(0, \beta) + \int_0^t F(t, \beta, x_k(t, \beta), u_k(t)) dt. \quad (5)$$

Similarly, let  $x(t, \beta)$  be the trajectory of the ensemble system driven by the limiting control function  $u(t)$ , then  $x(t, \beta)$  satisfies the same equation as

$$x(t, \beta) = x(0, \beta) + \int_0^t F(t, \beta, x(t, \beta), u(t)) dt \quad (6)$$

Taking the limit as  $k \rightarrow \infty$  for both sides of the equation in (5) yields

$$\begin{aligned} \lim_{k \rightarrow \infty} x_k(t, \beta) &= x(0, \beta) + \lim_{k \rightarrow \infty} \int_0^t F(t, \beta, x_k(t, \beta), u_k(t)) dt \\ &= x(0, \beta) + \int_0^t \lim_{k \rightarrow \infty} F(t, \beta, x_k(t, \beta), u_k(t)) dt \\ &= x(0, \beta) + \int_0^t F(t, \beta, \lim_{k \rightarrow \infty} x_k(t, \beta), \lim_{k \rightarrow \infty} u_k(t)) dt \\ &= x(0, \beta) + \int_0^t F(t, \beta, \lim_{k \rightarrow \infty} x_k(t, \beta), u(t)) dt \end{aligned}$$

where the second and third equalities follow from the dominant convergence theorem and continuity of  $F$ , respectively (Folland, 2013). Because the solution of the ensemble system in (1), equivalently, the fixed point equation in (6), is unique for each  $\beta \in \Omega$  by Assumptions S2, we conclude that  $x(t, \beta) = \lim_{k \rightarrow \infty} x_k(t, \beta)$  for all  $\beta \in \Omega$ . Applying the dominant convergence theorem again to  $J$  with the continuity of  $r$  and  $K$ , we also obtain

$$\begin{aligned} \lim_{k \rightarrow \infty} J(u_k) &= \lim_{k \rightarrow \infty} \int_{\Omega} \left[ \int_0^T r(x_k(t, \beta), u_k(t)) dt + K(x_k(T, \beta)) \right] d\beta \\ &= \int_{\Omega} \left[ \int_0^T r(\lim_{k \rightarrow \infty} x_k(t, \beta), \lim_{k \rightarrow \infty} u_k(t)) dt + K(\lim_{k \rightarrow \infty} x_k(T, \beta)) \right] d\beta \\ &= \int_{\Omega} \left[ \int_0^T r(x(t, \beta), u(t)) dt + K(x(T, \beta)) \right] d\beta = J(u), \end{aligned}$$

indicating the continuity of  $F$  as desired.

**Compactness of the space of control policies.** By Assumption S1 that control inputs in  $\mathcal{U}$  are bounded by a constant  $A$  uniformly,  $\mathcal{U}$  is the closed ball with the radius  $A$  centered at the 0 control input in the space of all bounded functions from  $[0, T]$  to  $\mathbb{R}^m$ . Then, by the Alaoglu's Theorem (Folland, 2013),  $\mathcal{U}$  is compact in the weak\* topology, which coincides with the topology of pointwise convergence as used in the proof of the continuity of  $J$  above, concluding the proof.

### A.2 REGULARITY OF VALUE FUNCTION

In particular, we would like to show that the value function  $V$  of the infinite-time horizon ensemble reinforcement learning problem is bounded. Moreover, if  $\lambda > L$ , the Lipschitz constant of  $\bar{F}$ , then  $V$

is Lipschitz continuous; if  $0 < \lambda \leq L$ , then  $V$  is Hölder continuous for some exponent  $0 < \alpha < 1$ . In addition, owing to the one-to-one correspondence between ensemble states and the associated moment sequences, the proof can be equivalently carried out by using the moment coordinates.

The boundedness of the value function  $V$  directly follows from that of the reward function and integrability of the discount factor as

$$\begin{aligned} |J(u)| &\leq \int_0^\infty e^{-\lambda t} |r(m(t), u(t))| dt \leq \max_{m \in \mathcal{M}, a \in [-A, A]} |r(m, a)| \cdot \int_0^\infty e^{-\lambda t} dt \\ &= \frac{1}{\lambda} \max_{m \in \mathcal{M}, a \in [-A, A]} |r(m, a)| < \infty. \end{aligned}$$

To show the Hölder continuity of  $V$ , pick  $m_0, \bar{m}'_0 \in \mathcal{M}$ , by the definition of  $V$ , for any  $\varepsilon > 0$ , there is some  $u \in \mathcal{U}$  such that

$$V(\bar{m}) + \varepsilon \geq \int_0^\infty e^{-\lambda t} r(\bar{m}(t), u(t)) dt$$

with  $\bar{m}(t)$  satisfying the system  $\frac{d}{dt} \bar{m}(t) = \bar{F}(\bar{m}(t), u(t))$  with  $\bar{m}(0) = \bar{m}_0$ . Let  $m(t)$  be the trajectory of the system driven by the same control input but with a different initial condition  $m(0) = m_0$ , then we have

$$\begin{aligned} V(m_0) - V(\bar{m}_0) &\leq \int_0^\infty e^{-\lambda t} (r(m(t), u(t)) - r(\bar{m}(t), u(t))) dt + \varepsilon \\ &\leq \int_0^\infty e^{-\lambda t} C |m(t) - \bar{m}(t)| dt + \varepsilon, \end{aligned}$$

where we use the Lipschitz continuity of  $r$ . Interchanging the role of  $m(t)$  and  $\bar{m}(t)$  yields  $V(\bar{m}_0) - V(m) \leq \int_0^\infty e^{-\lambda t} C |\bar{m}(t) - m(t)| dt + \varepsilon$ . Together that  $\varepsilon$  is arbitrary, we obtain

$$|V(m) - V(\bar{m})| \leq C \int_0^\infty e^{-\lambda t} |m(t) - \bar{m}(t)| dt. \quad (7)$$

To estimate the term  $|m(t) - \bar{m}(t)|$ , we notice

$$\frac{d}{dt} (m(t) - \bar{m}(t)) = \bar{F}(m(t), u(t)) - \bar{F}(\bar{m}(t), u(t)) \leq L |m(t) - \bar{m}(t)|.$$

Similarly, interchanging the role of  $m(t)$  and  $\bar{m}(t)$  yields

$$\frac{d}{dt} |m(t) - \bar{m}(t)| \leq L |m(t) - \bar{m}(t)|,$$

which is well-defined for all  $t$  since  $m(t) - \bar{m}(t) \neq 0$ , otherwise, it will violate the uniqueness of solutions for the ordinary differential equation  $\frac{d}{dt} m(t) = \bar{F}(m(t), u(t))$ . Now, applying Gronwall's inequality gives

$$|m(t) - \bar{m}(t)| \leq e^{Lt} |m_0 - \bar{m}_0|.$$

Consequently, we have

$$|V(m) - V(\bar{m})| \leq C |m - \bar{m}_0| \int_0^\infty e^{-(\lambda-L)t} dt.$$

Therefore, if  $\lambda > L$ , then

$$|V(m_0) - V(\bar{m}_0)| \leq \frac{C}{\lambda - L} |m_0 - \bar{m}_0|$$

holds so that  $V$  is Lipschitz continuous.

Next, if  $0 < \lambda \leq L$ , we pick  $0 < \alpha < 1$  such that  $\lambda > \alpha L$ . Note that because  $r(\cdot, u)$  is Lipschitz continuous by Assumption C2, it is also  $\alpha$ -Hölder continuous, i.e.,  $|r(m(t), u(t)) - r(\bar{m}(t), u(t))| \leq C |m(t) - \bar{m}(t)|^\alpha$ , which gives a variant of (7) as

$$|V(m_0) - V(\bar{m}_0)| \leq C \int_0^\infty e^{-\lambda t} |m(t) - \bar{m}(t)|^\alpha dt.$$

Together with  $|m(t) - \bar{m}(t)|^\alpha \leq e^{\alpha L t} |m - \bar{m}|^\alpha$ , we have

$$|V(m_0) - V(\bar{m}_0)| \leq C |m_0 - \bar{m}_0|^\alpha \int_0^\infty e^{-(\lambda - \alpha L)t} dt \leq \frac{C}{\lambda - \alpha L} |m_0 - \bar{m}_0|^\alpha,$$

giving Hölder continuity of  $V$  with Hölder exponent  $\alpha$ .

## B MOMENT CONVERGENCE OF TRUNCATED REINFORCEMENT LEARNING PROBLEMS

At first, as proved in Appendix A, the space of control policies  $\mathcal{U}$  is compact, and hence the sequence  $\{u_N^*\}_{N \in \mathbb{N}}$  has a convergent subsequence  $\{u_{N_i}^*\}_{i \in \mathbb{N}}$  and we denote the limit by  $u^*$ . It then remains to show that  $V_{N_i} \rightarrow V$  as  $i \rightarrow \infty$  and  $u^*$  solves the Hamilton-Jacobi-Bellman equation along the trajectory  $m^*(t)$  of the moment system steered by  $u^*(t)$  as

$$\frac{\partial V}{\partial t} + DV(t, m^*(t)) \cdot \bar{F}(t, m^*(t), u^*(t)) + \bar{r}(m^*(t), u^*(t)) = 0, \quad V(T, m(T)) = \bar{K}(m(T)). \quad (8)$$

To this end, let  $V_{N_i}$  denote the value function for the order  $N$  truncated ensemble reinforcement learning problem, then for all  $0 \leq t \leq T$ ,  $V_{N_i}(t, \cdot)$  is essentially the restriction of  $V(t, \cdot)$  to the space consisting of the order  $N_i$  truncated moment sequences  $\hat{m}_{N_i}$ , which implies  $V(t, \hat{m}_N) = V_{N_i}(t, \hat{m}_{N_i})$ . The Lipschitz continuity of  $V$  then yields

$$|V_{N_i}(t, \hat{m}_{N_i}) - V_{N_i}(t', \hat{m}'_{N_i})| = |V(t, \hat{m}_{N_i}) - V(t', \hat{m}'_{N_i})| \leq C(|t - t'| + |\hat{m}_{N_i} - \hat{m}'_{N_i}|)$$

for any time  $0 \leq t, t' \leq T$  and order  $N_i$  truncated moment sequences  $\hat{m}_{N_i}$  and  $\hat{m}'_{N_i}$ . This implies the family of value functions  $\{V_{N_i}\}_{i \in \mathbb{N}}$  are Lipschitz continuous with the same Lipschitz constant. By the definition, it immediately follows that  $\{V_{N_i}\}_{i \in \mathbb{N}}$  is uniformly equicontinuous (Rudin, 1976). Together with the boundedness of  $V$ , and hence all  $V_{N_i}$ , we conclude that  $V_{N_i}$ , maybe by passing to a subsequence, converges uniformly to a function  $V'$  on compact sets by Arzela-Ascoli Theorem (Folland, 2013). As a consequence  $V'$  is also continuous, since each  $V_{N_i}$  is. At last, we need to show the  $V'$  satisfies the Hamilton-Jacobi-Bellman equation in (8).

We first note that because  $u_{N_i}^*$  is the optimal control policy, it necessarily satisfies

$$\begin{aligned} \frac{\partial V_{N_i}}{\partial t}(t, \hat{m}_{N_i}^*(t)) + DV_{N_i}(t, \hat{m}_{N_i}^*(t)) \cdot \hat{F}_{N_i}(t, \hat{m}_{N_i}^*(t), u_{N_i}^*(t)) &= 0, \\ V_{N_i}(T, \hat{m}_{N_i}^*(T)) &= \hat{K}_{N_i}(\hat{m}_{N_i}^*(T)), \end{aligned} \quad (9)$$

where  $\hat{m}_{N_i}^*(t)$  is the corresponding optimal trajectory and  $\hat{K}_{N_i}$  is the restriction of  $K$  to the space of order  $N_i$  truncated moment sequences. In addition, as the solution of the truncated moment system  $\frac{d}{dt} \hat{m}_{N_i}^*(t) = \hat{F}_{N_i}(t, \hat{m}_{N_i}^*(t), \hat{u}_{N_i}^*(t))$ ,  $\hat{m}_{N_i}^*(t)$  satisfies the fixed point equation  $\hat{m}_{N_i}^*(t) = \hat{m}_{N_i}^*(0) + \int_0^t \hat{F}_{N_i}(s, \hat{m}_{N_i}^*(s), \hat{u}_{N_i}^*(s)) ds$ . The continuity of  $\hat{F}_{N_i}$  and the dominant convergence theorem together imply

$$\begin{aligned} \lim_{i \rightarrow \infty} \hat{m}_{N_i}^*(t) &= \lim_{i \rightarrow \infty} \hat{m}_{N_i}^*(0) + \lim_{i \rightarrow \infty} \int_0^t \hat{F}_{N_i}(s, \hat{m}_{N_i}^*(s), \hat{u}_{N_i}^*(s)) ds \\ &= m^*(0) + \int_0^t \hat{F}_{N_i}(s, \lim_{i \rightarrow \infty} \hat{m}_{N_i}^*(s), \lim_{i \rightarrow \infty} \hat{u}_{N_i}^*(s)) ds \\ &= m^*(0) + \int_0^t F(s, \lim_{i \rightarrow \infty} \hat{m}_{N_i}^*(s), u^*(s)) ds, \end{aligned}$$

which reveals the convergence of  $\hat{m}_{N_i}^*(t)$  to a trajectory  $m^*(t)$  solving the untruncated moment system  $\frac{d}{dt} m^*(t) = F(t, m^*(t), u^*(t))$ . More importantly, the convergence of  $\hat{m}_{N_i}^*(t)$  also implies that all these trajectories lay in a compact space, and hence the convergence of  $V_{N_i}$  on compact sets applies to the Hamilton-Jacobi-Bellman equation in (9) as

$$\begin{aligned} 0 &= \lim_{i \rightarrow \infty} \frac{\partial V_{N_i}}{\partial t}(t, \hat{m}_{N_i}^*(t)) + \lim_{i \rightarrow \infty} DV_{N_i}(t, \hat{m}_{N_i}^*(t)) \cdot \hat{F}_{N_i}(t, \hat{m}_{N_i}^*(t), u_{N_i}^*(t)) \\ &= \frac{\partial}{\partial t} \lim_{i \rightarrow \infty} V_{N_i}(t, \hat{m}_{N_i}^*(t)) + D \left[ \lim_{i \rightarrow \infty} (V_{N_i}(t, \hat{m}_{N_i}^*(t))) \right] \cdot \lim_{i \rightarrow \infty} \hat{F}_{N_i}(t, \hat{m}_{N_i}^*(t), u_{N_i}^*(t)) \\ &= \frac{\partial}{\partial t} V'(t, \hat{m}_{N_i}^*(t)) + DV'(t, \lim_{i \rightarrow \infty} \hat{m}_{N_i}^*(t)) \cdot \bar{F}(t, \lim_{i \rightarrow \infty} \hat{m}_{N_i}^*(t), \lim_{i \rightarrow \infty} u_{N_i}^*(t)) \\ &= \frac{\partial}{\partial t} V'(t, m^*(t)) + DV'(t, m^*(t)) \cdot \bar{F}(t, m^*(t), u^*(t)) \end{aligned}$$

together with the terminal condition

$$\begin{aligned} 0 &= \lim_{i \rightarrow \infty} V_{N_i}(T, \hat{m}_{N_i}^*(T)) - \lim_{i \rightarrow \infty} \hat{K}_{N_i}(\hat{m}_{N_i}^*(T)) = V'(T, \lim_{i \rightarrow \infty} \hat{m}_{N_i}^*(T)) - \bar{K}(\lim_{i \rightarrow \infty} \hat{m}_{N_i}^*(T)) \\ &= V'(m^*(t)) - \bar{K}(m^*(T)), \end{aligned}$$

where the changes of limits and differentiations follo from the equicontinuity of the sequence of functions  $\{V_{N_i}\}$  (Rudin, 1976). This shows that  $V'$  satisfies the Hamilton-Jacobi-Bellman equation, and hence  $V = V'$  holds by the uniqueness of the (viscosity) solution of the Hamilton-Jacobi-Bellman equation (Evans, 2010). As a consequence,  $u^*(t)$  is the optimal control policy and  $m^*(t)$  is the optimal moment trajectory.
